# Supplementary material for: Effects of multivalent histamine supported on gold nanoparticles: activation of histamine receptors by derivatized histamine at subnanomolar concentrations
Source: Royal Society of Chemistry journal article supplement (doi:10.1039/c5ob01354b), 2015-01-01

Supplementary Information:

NMR spectra:

Au-MUDA-HA  $\phi$  14 nm:

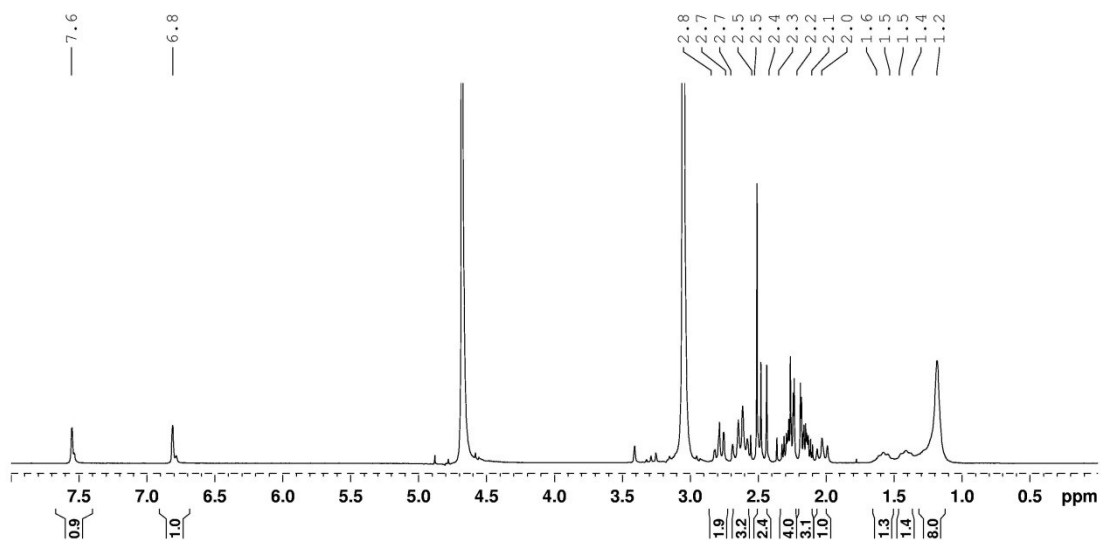

Au-MUDA  $\phi$  14 nm:

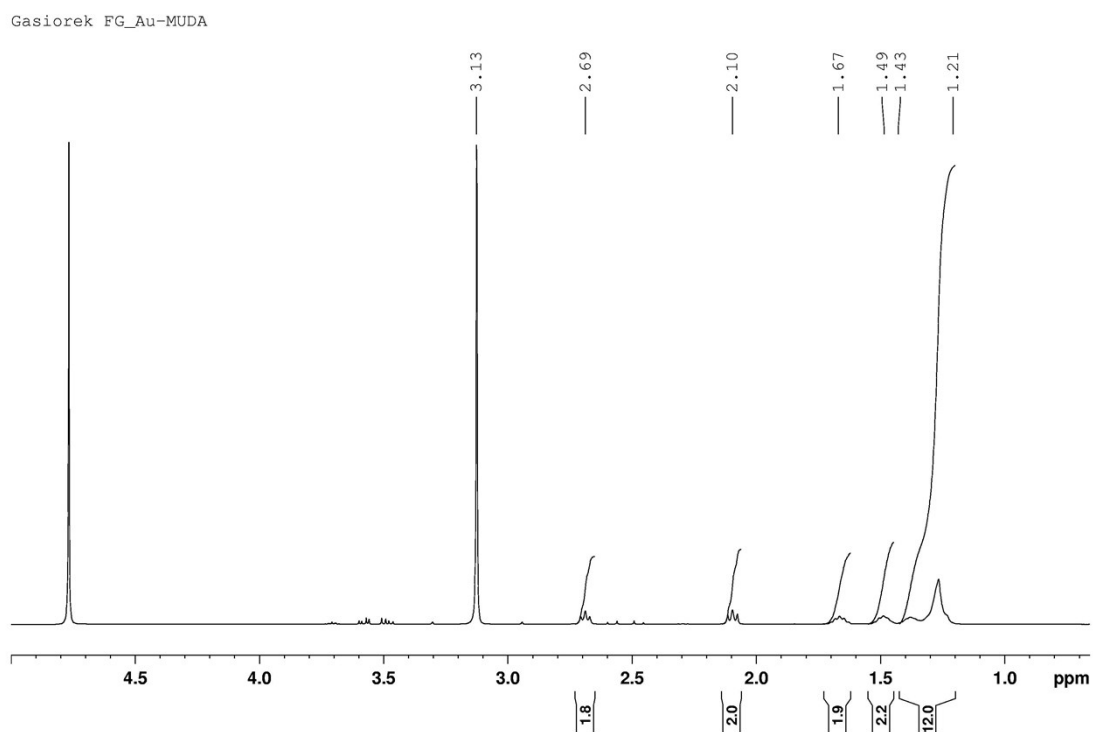

Au-Citrat Ø 14 nm:

Gasiorek FG\_66

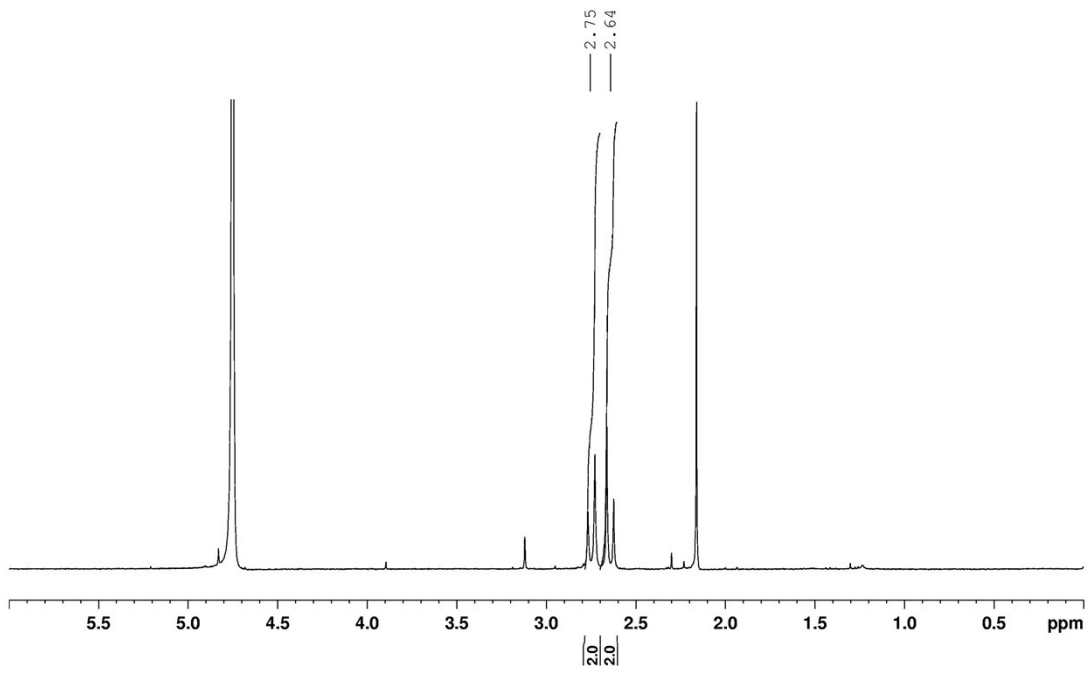

Au-MUDOLS Ø 14 nm:

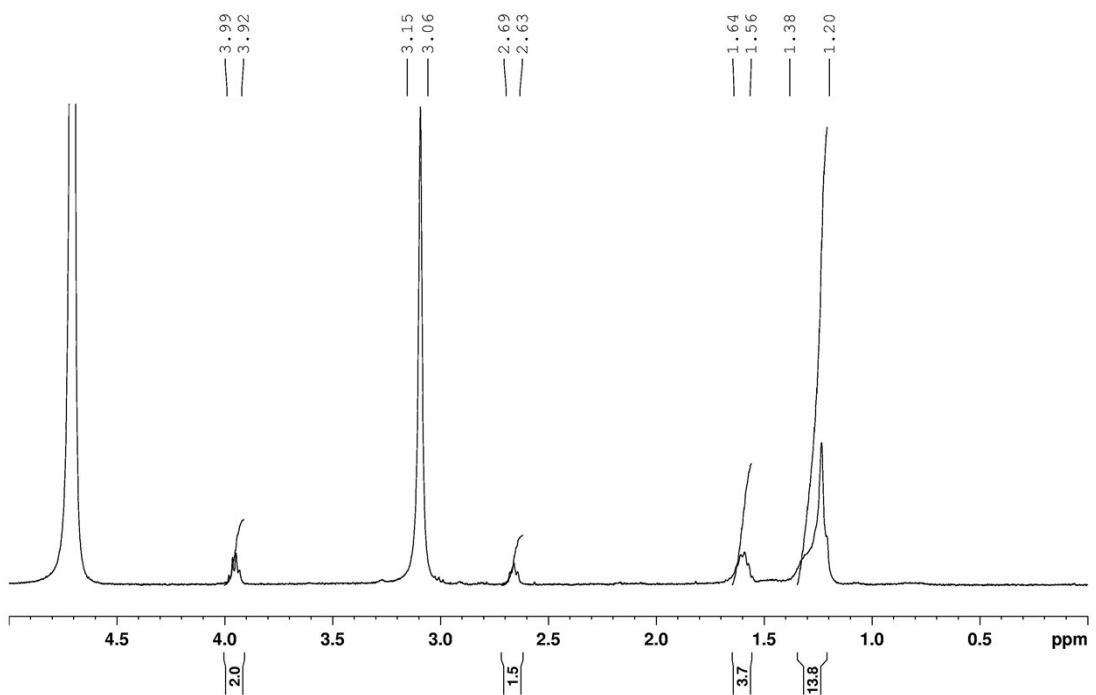

AcS-MUDA-HA:

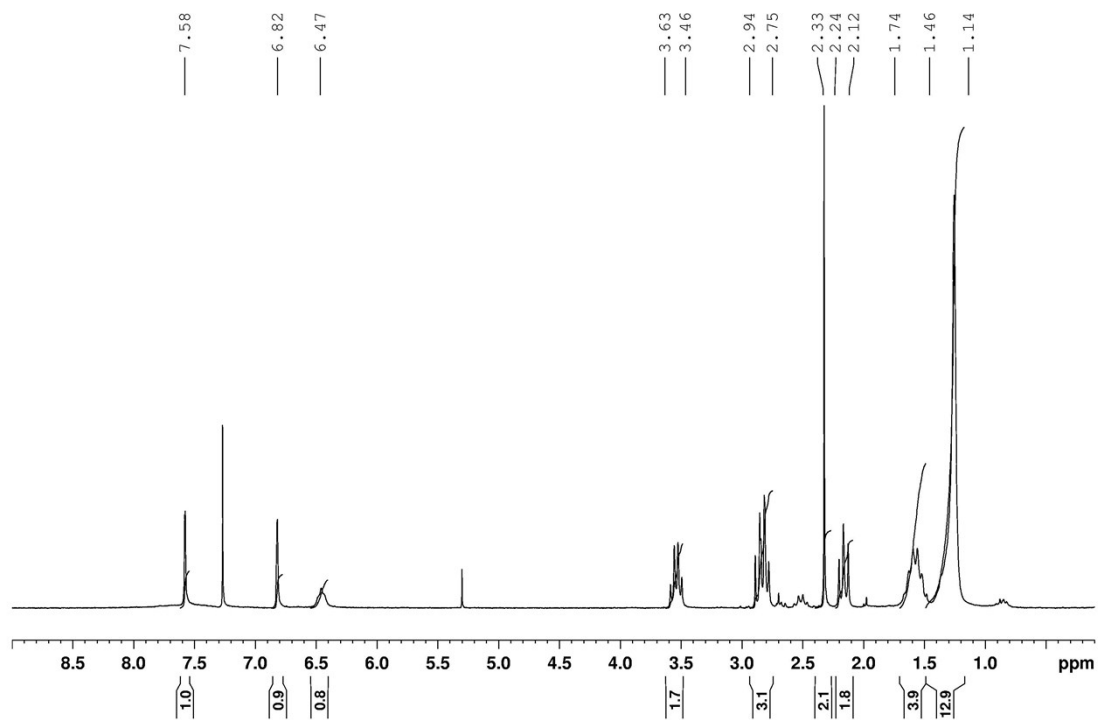

AcS-MUDA-NHS:

F.Gasiorek, FG 09

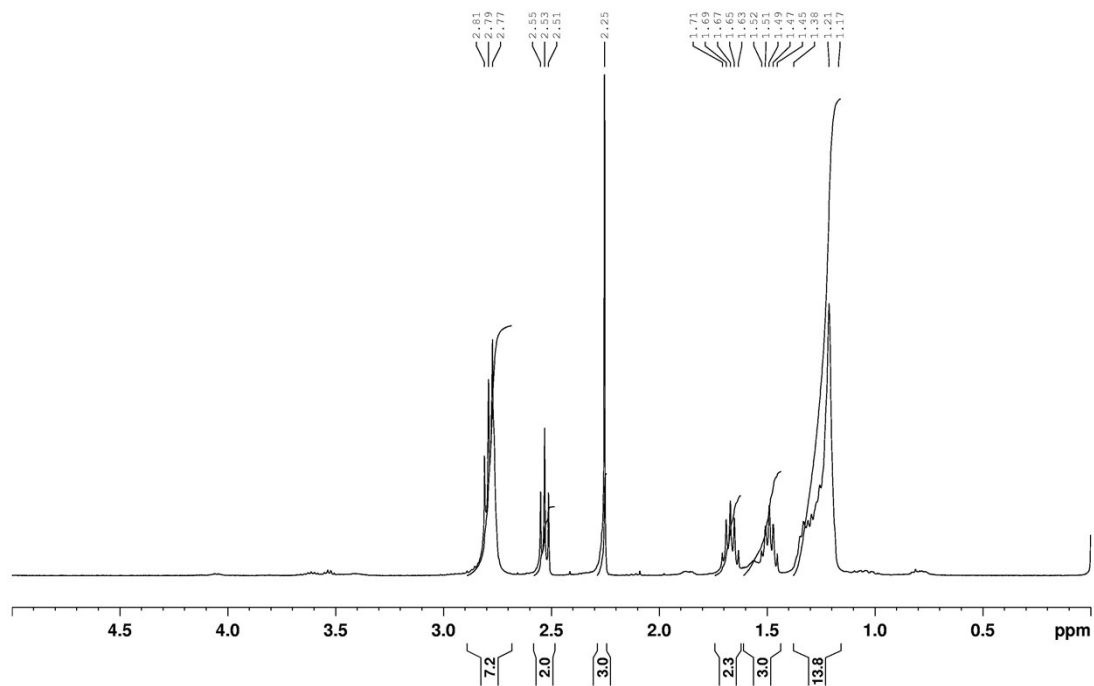

AcS-MUDA:

F.Gasiorek, FG 07

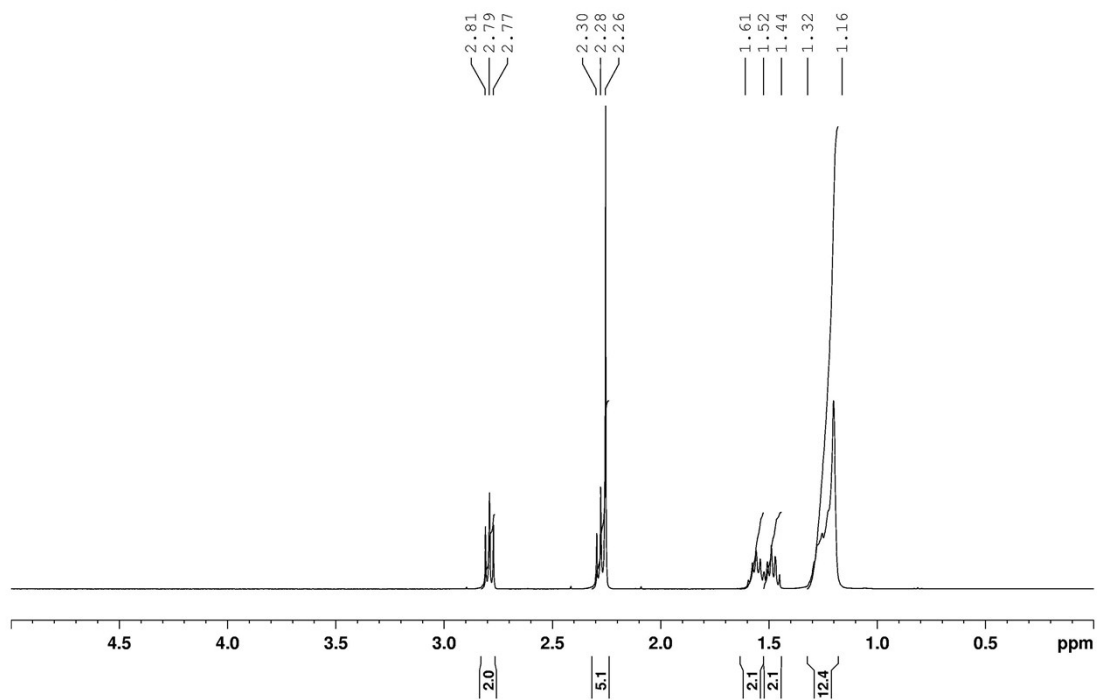

MUDOLS:

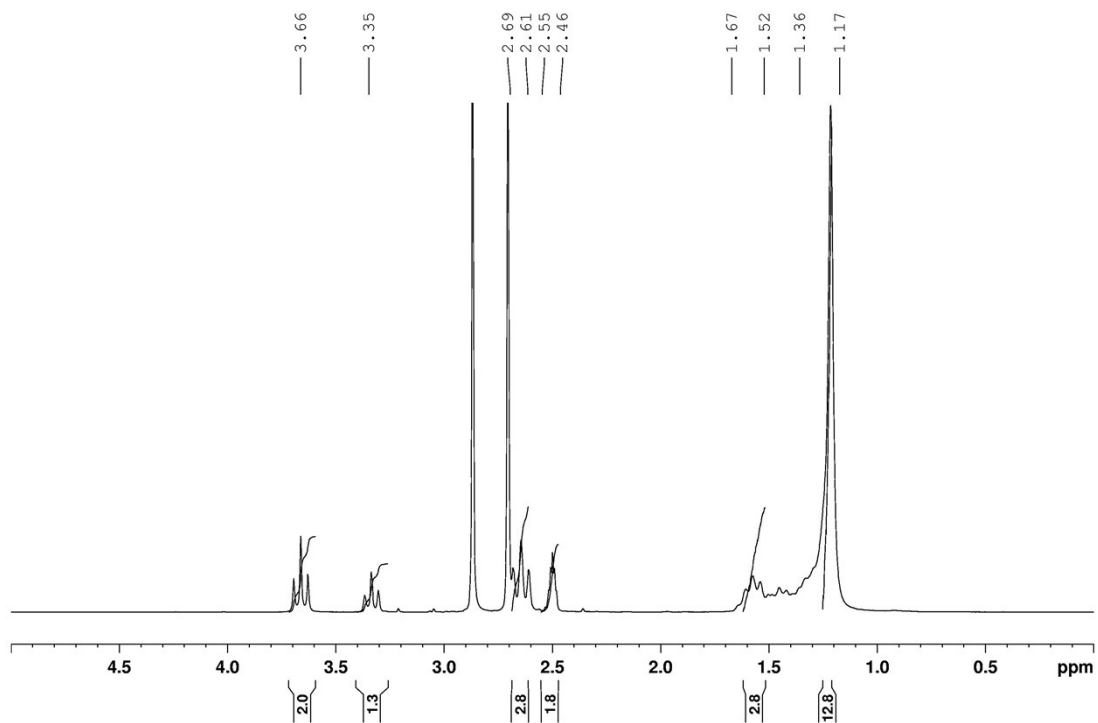

Supplement: c5ob01354b1.pdf [file c5ob01354b1.pdf]
